# Supplementary material for: Enantioselective amino acid interactions in solution
Source: Royal Society of Chemistry journal article supplement (doi:10.1039/d3cp00278k), 2023-01-01
Supplement: d3cp00278k1.pdf [file d3cp00278k1.pdf]

## Supplementary Information

### Enantioselective Amino Acids Interactions in Solution

Natsuki Watanabe <sup>1</sup>, Mitsuo Shoji <sup>\*2,3</sup>, Koichi Miyagawa <sup>2</sup>, Yuta Hori <sup>2</sup>,

Mauro Boero <sup>4</sup>, Masayuki Umemura <sup>2</sup> and Yasuteru Shigeta <sup>2</sup>

<sup>1</sup> Graduate School of Pure and Applied Sciences, University of Tsukuba, 1-1-1

Tennodai, Tsukuba, Ibaraki 305-8571, Japan.

<sup>2</sup> Center for Computational Sciences, University of Tsukuba, 1-1-1 Tennodai, Tsukuba,

Ibaraki 305-8577, Japan.

<sup>3</sup> JST-PRESTO, 4-1-8 Honcho, Kawaguchi, Saitama 332-0012, Japan

<sup>4</sup> University of Strasbourg, Institut de Physique et Chimie des Matériaux de Strasbourg,

CNRS, UMR 7504, 23 rue du Loess, F-67034 France.

\* Corresponding author: Mitsuo Shoji (*E-mail*: [mshoji@ccs.tsukuba.ac.jp](mailto:mshoji@ccs.tsukuba.ac.jp))

## **Table of Contents**

### **Supplementary Figure:**

**Figure S1. Molecular structures of the third stable conformations of amino acids.**

**Figure S2. Molecular graphs of amino acid dimers obtained from AIM analysis.**

### **Supplementary Table:**

**Table S1. Relative energies of the third stable conformations of amino acid dimers**

**Table S2. AIM analysis of the most stable conformations of amino acid dimers**

**Table S3. AIM analysis of the second stable conformations of amino acid dimers**

**Table S4. AIM analysis of the third stable conformations of amino acid dimers**

**Supplementary Text: Details of the MM force field**

**Supplementary Data: Cartesian coordinates of amino acid dimers**

### Supplementary Figure

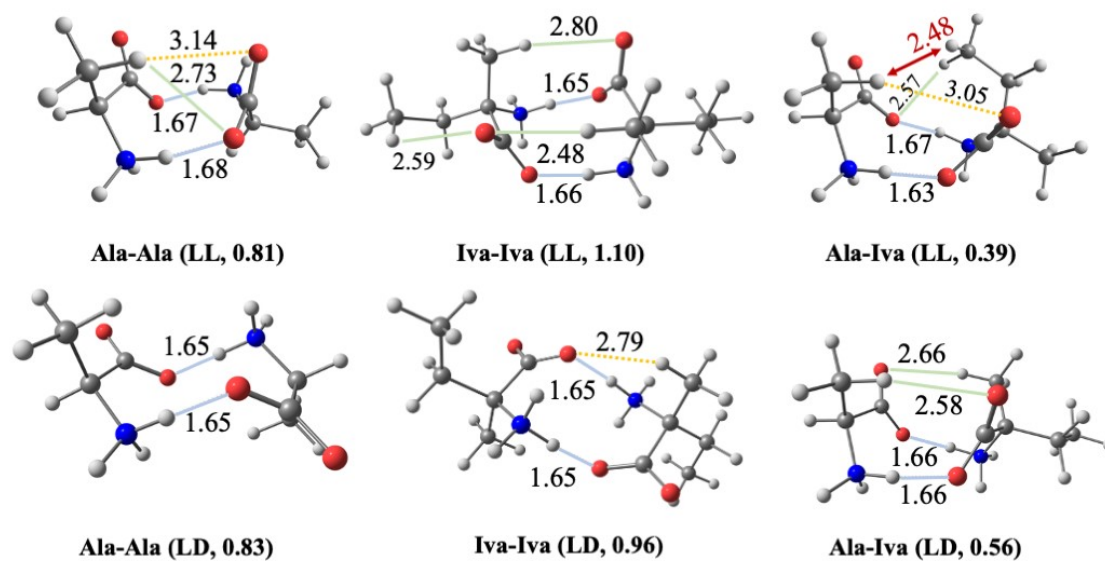

Figure S1. The third stable conformations of amino acid dimers in zwitterionic form. Color lines represent the electrostatic interactions (blue), hydrogen bonding (green), measurement (dashed yellow) and vdW contacts (dark red) along with their distances (Å). Relative energies ( $\text{kcal mol}^{-1}$ ) to each of the most stable conformations of LL are given in parenthesis.

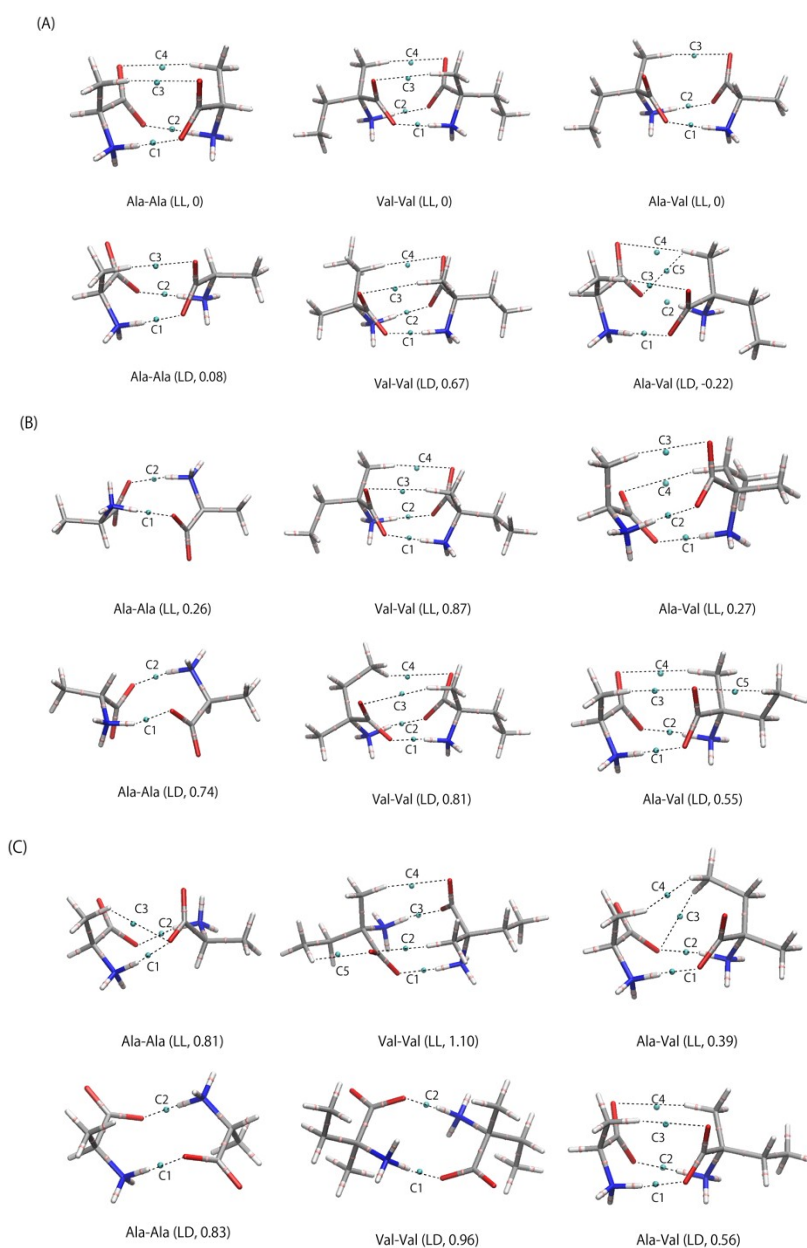

Figure S2. Molecular graphs of amino acid dimers obtained from Atoms in Molecules (AIM) analysis in the (A) most stable conformations, (B) second stable conformations and (C) third stable conformations. Attractors are colored according to the chemical element, and critical points along interaction lines are shown as small spheres, where the pink and cyan colors represent negative and positive signs of their Laplacian values, respectively. Detailed distances and positive values of the Laplacian are shown in Tables S2-S4.

## Supplementary Table

Table S1. Relative energies (kcal mol<sup>-1</sup>) of the stable conformations of amino acid dimers in zwitterionic forms. Energies were calculated at the B3LYP-D3//6-311++G(d,p) level within PCM. Zero-point vibrational energy corrections are included.

| Conformations          | Ala-Ala |      | Iva-Iva |      | Ala-Iva |       |
|------------------------|---------|------|---------|------|---------|-------|
|                        | LL      | LD   | LL      | LD   | LL      | LD    |
| 1 <sup>st</sup> stable | 0       | 0.08 | 0       | 0.67 | 0       | -0.22 |
| 2 <sup>nd</sup> stable | 0.26    | 0.74 | 0.87    | 0.81 | 0.27    | 0.55  |
| 3 <sup>rd</sup> stable | 0.81    | 0.83 | 1.10    | 0.96 | 0.39    | 0.56  |

Table S2. AIM analysis for the most stable conformations of amino acid dimers calculated at B3LYP/6-311+G(p,d) level of theory. Relevant distances and positive Laplacian values for critical points are reported. The corresponding molecular graphs are shown in Fig S3A.

| Molecule<br>(chirality, $\Delta E/\text{kcal mol}^{-1}$ ) | Critical<br>points | Atoms in<br>interaction | Atomic<br>distance/Å | Attractors<br>distance/Å | Attractor-Critical<br>point distance/Å | $\nabla^2\rho(r_c)/\text{a.u.}$ |
|-----------------------------------------------------------|--------------------|-------------------------|----------------------|--------------------------|----------------------------------------|---------------------------------|
| Ala-Ala(LL, 0)                                            | C1                 | N-H...O                 | 1.66                 | 1.68                     | 0.57 (H...C1)                          | 0.1442                          |
|                                                           | C2                 | N-H...O                 | 1.66                 | 1.68                     | 0.57 (H...C2)                          | 0.1442                          |
|                                                           | C3                 | C-H...O                 | 2.65                 | 2.67                     | 1.08 (H...C3)                          | 0.0205                          |
|                                                           | C4                 | C-H...O                 | 2.65                 | 2.67                     | 1.08 (H...C4)                          | 0.0205                          |
| Ala-Ala(LD, 0.08)                                         | C1                 | N-H...O                 | 1.65                 | 1.67                     | 0.57 (H...C1)                          | 0.1443                          |
|                                                           | C2                 | N-H...O                 | 1.64                 | 1.66                     | 0.56 (H...C2)                          | 0.1485                          |
|                                                           | C3                 | C-H...O                 | 2.62                 | 2.63                     | 1.07 (H...C3)                          | 0.0212                          |
| Val-Val(LL, 0)                                            | C1                 | N-H...O                 | 1.65                 | 1.67                     | 0.57 (H...C1)                          | 0.1450                          |
|                                                           | C2                 | N-H...O                 | 1.65                 | 1.67                     | 0.57 (H...C2)                          | 0.1450                          |
|                                                           | C3                 | C-H...O                 | 2.66                 | 2.67                     | 1.08 (H...C3)                          | 0.0211                          |
|                                                           | C4                 | C-H...O                 | 2.66                 | 2.67                     | 1.08 (H...C4)                          | 0.0211                          |
| Val-Val(LD, 0.67)                                         | C1                 | N-H...O                 | 1.66                 | 1.68                     | 0.57 (H...C1)                          | 0.1437                          |
|                                                           | C2                 | N-H...O                 | 1.66                 | 1.67                     | 0.57 (H...C2)                          | 0.1461                          |
|                                                           | C3                 | C-H...O                 | 2.65                 | 2.66                     | 1.08 (H...C3)                          | 0.0215                          |
|                                                           | C4                 | C-H...O                 | 2.69                 | 2.70                     | 1.10 (H...C4)                          | 0.0210                          |
| Ala-Val(LL, 0)                                            | C1                 | N-H...O                 | 1.63                 | 1.65                     | 0.56 (H...C1)                          | 0.1495                          |
|                                                           | C2                 | N-H...O                 | 1.66                 | 1.68                     | 0.57 (H...C2)                          | 0.1433                          |
|                                                           | C3                 | C-H...O                 | 2.61                 | 2.62                     | 1.06 (H...C3)                          | 0.0220                          |
| Ala-Val(LD, -0.22)                                        | C1                 | N-H...O                 | 1.65                 | 1.67                     | 0.57 (H...C1)                          | 0.1462                          |
|                                                           | C2                 | N-H...O                 | 1.66                 | 1.68                     | 0.57 (H...C2)                          | 0.1442                          |
|                                                           | C3                 | C-H...O                 | 2.68                 | 2.70                     | 1.09 (H...C3)                          | 0.0197                          |
|                                                           | C4                 | C-H...O                 | 2.73                 | 2.74                     | 1.11 (H...C4)                          | 0.02011                         |
|                                                           | C5                 | C-H...O                 | 2.81                 | 2.82                     | 1.18 (H...C4)                          | 0.0214                          |

Table S3. AIM analysis for the second stable conformations of amino acid dimers calculated at B3LYP/6-311+G(p,d) level of theory. Relevant distances and positive Laplacian values for critical

| Molecule<br>(chirality, $\Delta E/\text{kcal mol}^{-1}$ ) | Critical<br>points | Atoms in<br>interaction | Atomic<br>distance/Å | Attractors<br>distance/Å | Attractor-Critical<br>point distance/Å | $\nabla^2\rho(r_c)/\text{a.u.}$ |
|-----------------------------------------------------------|--------------------|-------------------------|----------------------|--------------------------|----------------------------------------|---------------------------------|
| Ala-Ala(LL, 0.26)                                         | C1                 | N-H...O                 | 1.64                 | 1.66                     | 0.56 (H...C1)                          | 0.1458                          |
|                                                           | C2                 | N-H...O                 | 1.64                 | 1.66                     | 0.56 (H...C2)                          | 0.1458                          |
| Ala-Ala(LD, 0.74)                                         | C1                 | N-H...O                 | 1.66                 | 1.68                     | 0.57 (H...C1)                          | 0.1380                          |
|                                                           | C2                 | N-H...O                 | 1.67                 | 1.69                     | 0.58 (H...C2)                          | 0.1419                          |
| Val-Val(LL, 0.87)                                         | C1                 | N-H...O                 | 1.65                 | 1.67                     | 0.57 (H...C1)                          | 0.1461                          |
|                                                           | C2                 | N-H...O                 | 1.65                 | 1.67                     | 0.57 (H...C2)                          | 0.1442                          |
|                                                           | C3                 | C-H...O                 | 2.69                 | 2.70                     | 1.10 (H...C3)                          | 0.0197                          |
|                                                           | C4                 | C-H...O                 | 2.61                 | 2.62                     | 1.06 (H...C4)                          | 0.0223                          |
| Val-Val(LD, 0.81)                                         | C1                 | N-H...O                 | 1.64                 | 1.66                     | 0.56 (H...C1)                          | 0.1506                          |
|                                                           | C2                 | N-H...O                 | 1.67                 | 1.69                     | 0.58 (H...C2)                          | 0.1426                          |
|                                                           | C3                 | C-H...O                 | 2.56                 | 2.57                     | 1.06 (H...C3)                          | 0.0281                          |
|                                                           | C4                 | C-H...H                 | 2.53                 | 2.55                     | 1.27 (H...C4)                          | 0.0112                          |
| Ala-Val(LL, 0.27)                                         | C1                 | N-H...O                 | 1.65                 | 1.67                     | 0.57 (H...C1)                          | 0.1447                          |
|                                                           | C2                 | N-H...O                 | 1.66                 | 1.68                     | 0.57 (H...C2)                          | 0.1449                          |
|                                                           | C3                 | C-H...O                 | 2.65                 | 2.66                     | 1.08 (H...C3)                          | 0.0204                          |
|                                                           | C4                 | C-H...O                 | 2.72                 | 2.73                     | 1.11 (H...C4)                          | 0.0206                          |
| Ala-Val(LD, 0.55)                                         | C1                 | N-H...O                 | 1.66                 | 1.68                     | 0.57 (H...C1)                          | 0.1411                          |
|                                                           | C2                 | N-H...O                 | 1.66                 | 1.67                     | 0.57 (H...C2)                          | 0.1451                          |
|                                                           | C3                 | C-H...O                 | 2.48                 | 2.49                     | 1.00 (H...C3)                          | 0.0274                          |
|                                                           | C4                 | C-H...O                 | 2.70                 | 2.71                     | 1.10 (H...C4)                          | 0.0189                          |
|                                                           | C5                 | C-H...O                 | 2.61                 | 2.61                     | 1.12 (H...C5)                          | 0.0308                          |

points are given. Corresponding molecular graphs are shown in Fig S3B.

Table S4. AIM analysis for the third stable conformations of amino acid dimers calculated at B3LYP/6-311+G(p,d) level. Relevant distances and positive Laplacian values for critical points are

| Molecule<br>(chirality, $\Delta E/\text{kcal mol}^{-1}$ ) | Critical<br>points | Atoms in<br>interaction | Atomic<br>distance/Å | Attractors<br>distance/Å | Attractor-Critical<br>point distance/Å | $\nabla^2\rho(r_c)/\text{a.u.}$ |
|-----------------------------------------------------------|--------------------|-------------------------|----------------------|--------------------------|----------------------------------------|---------------------------------|
| Ala-Ala(LL, 0.81)                                         | C1                 | N-H...O                 | 1.67                 | 1.69                     | 0.58 (H...C1)                          | 0.1426                          |
|                                                           | C2                 | N-H...O                 | 1.68                 | 1.70                     | 0.58 (H...C2)                          | 0.1347                          |
|                                                           | C3                 | C-H...O                 | 2.73                 | 2.74                     | 1.15 (H...C3)                          | 0.0215                          |
| Ala-Ala(LD, 0.83)                                         | C1                 | N-H...O                 | 1.65                 | 1.67                     | 0.56 (H...C1)                          | 0.1437                          |
|                                                           | C2                 | N-H...O                 | 1.65                 | 1.66                     | 0.56 (H...C2)                          | 0.1437                          |
| Val-Val(LL, 1.10)                                         | C1                 | N-H...O                 | 1.66                 | 1.68                     | 0.57 (H...C1)                          | 0.1404                          |
|                                                           | C2                 | N-H...O                 | 1.65                 | 1.67                     | 0.57 (H...C2)                          | 0.1478                          |
|                                                           | C3                 | C-H...O                 | 2.48                 | 2.50                     | 1.00 (H...C3)                          | 0.0275                          |
|                                                           | C4                 | C-H...O                 | 2.80                 | 2.81                     | 1.15 (H...C4)                          | 0.0164                          |
|                                                           | C5                 | C-H...O                 | 2.59                 | 2.60                     | 1.12 (H...C4)                          | 0.0313                          |
| Val-Val(LD, 0.96)                                         | C1                 | N-H...O                 | 1.65                 | 1.67                     | 0.57 (H...C1)                          | 0.1419                          |
|                                                           | C2                 | N-H...O                 | 1.65                 | 1.67                     | 0.57 (H...C2)                          | 0.1420                          |
| Ala-Val(LL, 0.39)                                         | C1                 | N-H...O                 | 1.63                 | 1.65                     | 0.56 (H...C1)                          | 0.1508                          |
|                                                           | C2                 | N-H...O                 | 1.67                 | 1.69                     | 0.58 (H...C2)                          | 0.1425                          |
|                                                           | C3                 | C-H...O                 | 2.57                 | 2.58                     | 1.06 (H...C3)                          | 0.0279                          |
|                                                           | C4                 | C-H...H                 | 2.48                 | 2.50                     | 1.24 (H...C4)                          | 0.0121                          |
| Ala-Val(LD, 0.56)                                         | C1                 | N-H...O                 | 1.66                 | 1.67                     | 0.57 (H...C1)                          | 0.1440                          |
|                                                           | C2                 | N-H...O                 | 1.66                 | 1.68                     | 0.57 (H...C2)                          | 0.1440                          |
|                                                           | C3                 | C-H...O                 | 2.58                 | 2.60                     | 1.05 (H...C3)                          | 0.0226                          |
|                                                           | C4                 | C-H...O                 | 2.66                 | 2.68                     | 1.08 (H...C4)                          | 0.0208                          |

given. Corresponding molecular graphs are shown in Fig S3C.



## Supplementary Text

### S1. Details of the MM force field

The force fields used in our approach is composed of three terms accounting for bond ( $V_{bond}$ ), angle bending ( $V_{angle}$ ) and van der Waals ( $V_{vdW}$ ) interactions,

$$V_{total} = V_{bond} + V_{angle} + V_{vdW} \quad (S1)$$

These terms are sufficient to provide a rapid and efficient initial optimization of the structures. Each term is explicitly reported here below.

#### Bond term

$$V_{bond} = \frac{1}{2} \sum_{i,j \in bonds} k_B (r_{ij} - r_{ij}^0)^2 \quad (S2)$$

The term accounting for the bond stretching and labeled as ‘*bonds*’ is the one reported in Eq. S1 is basically a sum of harmonic contributions for each atomic pairs [ $i, j$ ] forming a chemical bond in the molecule. For example, in the case of alanine shown in Figure S2, the pair list is

$$bonds = \{[1, 2], [1, 6], [1, 7], [1, 9], [2, 3], [2, 8], [2, 10], \dots\}. \quad (S3)$$

The parameter  $k_B$  is a force constant, set to  $k_B = 1000$ .  $r_{ij}$  is the instantaneous interatomic distance  $r_{ij} \equiv |r_i - r_j|$ .  $r_{ij}^0$  is the equilibrium distance depending on the type of atoms  $i$  and  $j$ , written as

$$r_{ij}^0 = r_i^0 + r_j^0 \quad (S4)$$

The parameters of  $r_i^0$  are listed in Table S1.

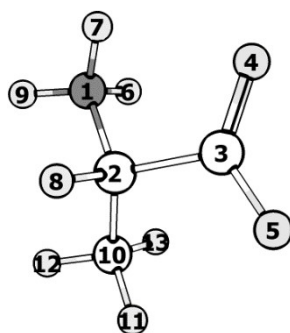

Figure S2. Molecular structure of alanine with atomic indexes.

Table S1. Equilibrium interatomic distances ( $r_i^0$ ) used in the bond term

| $i$ | $r_i^0$ (Å) |
|-----|-------------|
| H   | 0.354       |
| C   | 0.729       |
| N   | 0.699       |
| O   | 0.680       |

### Angle bending term

$$V_{angle} = \frac{1}{2} \sum_{l,m,n \in \text{angles}} k_A (\theta_{lmn} - \theta_{lmn}^0)^2 \quad (\text{S5})$$

The three-body term accounting for the angles is labeled with ‘*angles*’ in Eq. S5 is computed from three atomic pairs  $[l, m, n]$  that form an angle with their respective chemical bonds. For instance, for alanine shown in the Figure S2, the three-body list is

$$\text{angles} = \{[1, 2, 3], [1, 2, 8], [1, 2, 10], [3, 2, 8], [3, 2, 10], \dots\} \quad (\text{S6})$$

The pre-factor  $k_A$  is the bending angle force constant, here set to  $k_A = 2$ .  $\theta_{lmn}$  is the bond angle formed by the three atoms  $l$ ,  $m$  and  $n$ , and  $\theta_{lmn}^0$  is the equilibrium angle, where  $\theta_{lmn}^0 = 109.5$  in this study.

### Van der Waals term

$$V_{vw} = \sum_{p,q \in \text{pairs}} D_{pq} \left( \left( \frac{r_{pq}^{vdW}}{r_{pq}} \right)^{12} - 2 \left( \frac{r_{pq}^{vdW}}{r_{pq}} \right)^6 \right) \quad (\text{S7})$$

The long-range dispersion van der Waals interaction of Eq. (S7) is represented by a typical Lennard-Jones potential. The subscript ‘*pairs*’ in reminds that this interaction pair-wise acting between atom pairs  $[p, q]$  in non-bonding conditions as in any classical force field.  $r_{pq}$  is the interatomic distance  $r_{pq} \equiv |r_p - r_q|$ .  $r_{pq}^{vdW}$  is the van der Waals radius depending on the type of atoms

$p$  and  $q$ , defined as

$$r_{pq}^{vdW} = \sqrt{r_p^{vdW} r_q^{vdW}} \quad (\text{S8})$$

The parameters of  $r_p^{vdW}$  are listed in Table S2.

$D_{pq}$  defines the potential depth that depends on the type of atoms  $p$  and  $q$ , written as

$$D_{pq} = \sqrt{D_p^{vdW} D_q^{vdW}} \quad (\text{S9})$$

and the resulting parameters of  $D_p^{vdW}$  are listed in the same Table S2.

Table S2. Used vdW parameters for the interatomic distance ( $r^{vdW}$ ) and potential depth ( $D^{vdW}$ )

| $p$ | $r_p^{vdW}$ (Å) | $D_p^{vdW}$ (kcal mol <sup>-1</sup> ) |
|-----|-----------------|---------------------------------------|
| H   | 1.70            | 0.060                                 |
| C   | 2.00            | 0.095                                 |
| N   | 1.85            | 0.069                                 |
| O   | 1.70            | 0.060                                 |

## Supplementary Data

### Cartesian coordinates of amino acid dimers

All the conformations are optimized at the B3LYP-D3/6-311++G(d,p) level. Atomic coordinates are provided in the standard XYZ format.

26

Ala-Ala (LL) \_1st

|   |             |             |             |
|---|-------------|-------------|-------------|
| N | -1.79382100 | 0.86358900  | 1.30787500  |
| C | -2.25061800 | 0.18685500  | 0.04150000  |
| C | -1.46163700 | -1.14304900 | -0.12183800 |
| O | -0.79699900 | -1.51867900 | 0.89495400  |
| O | -1.57023400 | -1.72238700 | -1.21127600 |
| H | -0.80806800 | 1.21799900  | 1.18550200  |
| H | -1.76543600 | 0.17825700  | 2.06512600  |
| H | -3.29974200 | -0.07833900 | 0.19108400  |
| H | -2.40534100 | 1.63605100  | 1.57092100  |
| C | -2.10786400 | 1.13859400  | -1.14052300 |
| H | -2.45197300 | 0.63116600  | -2.04049200 |
| H | -2.71260100 | 2.03722900  | -0.99486000 |
| H | -1.06574400 | 1.43307300  | -1.28450600 |
| N | 1.79357300  | -0.86394500 | 1.30786000  |
| C | 2.25058200  | -0.18684100 | 0.04176400  |
| C | 1.46137200  | 1.14294400  | -0.12138000 |
| O | 0.79681200  | 1.51834100  | 0.89555000  |
| O | 1.57048100  | 1.72289100  | -1.21044200 |
| H | 2.40500700  | -1.63652300 | 1.57076400  |
| H | 0.80780900  | -1.21822800 | 1.18521300  |
| H | 3.29962600  | 0.07849000  | 0.19168100  |
| H | 1.76510300  | -0.17883500 | 2.06531300  |
| C | 2.10828200  | -1.13830200 | -1.14053800 |
| H | 2.45252900  | -0.63059000 | -2.04029200 |
| H | 1.06625100  | -1.43292600 | -1.28485700 |
| H | 2.71313700  | -2.03687100 | -0.99494500 |

26

Ala-Ala (LL) 2nd

|   |               |               |               |
|---|---------------|---------------|---------------|
| N | 1.7021570157  | -1.1052400495 | -1.0702116706 |
| C | 2.2172125754  | -0.4480545908 | 0.181693135   |
| C | 1.5127120447  | 0.9235000019  | 0.3518349427  |
| O | 1.5909598656  | 1.4433648106  | 1.4737755523  |
| O | 0.945663318   | 1.386112439   | -0.6875840741 |
| H | 2.2086140996  | -1.9630996526 | -1.2900951225 |
| H | 0.6735263646  | -1.3197613391 | -0.9625094592 |
| H | 1.9270349695  | -1.0931337197 | 1.011079813   |
| H | 1.7866234915  | -0.4523710388 | -1.852483511  |
| C | 3.7346892892  | -0.2962427747 | 0.1242737711  |
| H | 4.0780115758  | 0.1783392035  | 1.0435763617  |
| H | 4.0334118364  | 0.3297540461  | -0.720926183  |
| H | 4.2262759248  | -1.2679110104 | 0.033708669   |
| N | -1.702107767  | 1.1052844905  | -1.0701757768 |
| C | -2.2172000986 | 0.4480451361  | 0.1816864781  |
| C | -1.5127393696 | -0.9235369649 | 0.3517788657  |
| O | -1.5910518335 | -1.4434626674 | 1.4736871769  |
| O | -0.9456159402 | -1.3860849761 | -0.6876268466 |
| H | -1.7865481566 | 0.4524505082  | -1.8524792802 |
| H | -0.6734808472 | 1.3198135236  | -0.9624373423 |
| H | -1.9270194988 | 1.0930767552  | 1.0111095782  |
| H | -2.2085641428 | 1.9631501719  | -1.2900372233 |
| C | -3.734680158  | 0.296279602   | 0.1242359526  |
| H | -4.0334078358 | -0.3296658534 | -0.721000348  |
| H | -4.2262373178 | 1.267966677   | 0.033712425   |
| H | -4.0780284049 | -0.1783397281 | 1.0435091163  |

26

Ala-Ala (LL) 3rd

|   |           |           |           |
|---|-----------|-----------|-----------|
| N | 1.871742  | 1.499361  | -0.069435 |
| C | 2.080255  | 0.056466  | -0.440831 |
| C | 1.231197  | -0.786295 | 0.548775  |
| O | 1.227959  | -0.40044  | 1.733279  |
| O | 0.640539  | -1.791244 | 0.058651  |
| H | 2.517518  | 2.129798  | -0.544551 |
| H | 0.875239  | 1.740695  | -0.318502 |
| H | 1.693951  | -0.060183 | -1.451428 |
| H | 1.984433  | 1.5932    | 0.944513  |
| C | 3.55618   | -0.318235 | -0.365765 |
| H | 3.941955  | -0.173298 | 0.646176  |
| H | 3.675411  | -1.369447 | -0.633507 |
| H | 4.150194  | 0.27949   | -1.061497 |
| N | -1.541558 | -1.026677 | -1.381742 |
| C | -2.370231 | -0.236536 | -0.400477 |
| C | -1.632605 | 1.095783  | -0.086506 |
| O | -0.666025 | 1.378238  | -0.862655 |
| O | -2.063578 | 1.761943  | 0.86454   |
| H | -1.207757 | -0.398369 | -2.115685 |
| H | -2.070373 | -1.790723 | -1.801947 |
| H | -3.298212 | 0.021989  | -0.915731 |
| H | -0.684242 | -1.41419  | -0.902406 |
| C | -2.662597 | -1.079983 | 0.834051  |
| H | -1.733401 | -1.360173 | 1.334515  |
| H | -3.210589 | -1.987516 | 0.56911   |
| H | -3.269777 | -0.495238 | 1.523174  |

26

Ala-Ala (LD) 1st

|   |             |             |             |
|---|-------------|-------------|-------------|
| N | 1.65656300  | -1.39893700 | 0.64260500  |
| C | 2.10532200  | -0.38153700 | -0.37035500 |
| C | 1.37896100  | 0.95848700  | -0.08524100 |
| O | 0.86529100  | 1.07481400  | 1.07117800  |
| O | 1.38681800  | 1.79207400  | -1.00230100 |
| H | 1.77464600  | -1.01362600 | 1.58232300  |
| H | 0.62662300  | -1.59631500 | 0.52131000  |
| H | 1.78543800  | -0.75234600 | -1.34424500 |
| H | 2.17975800  | -2.27165200 | 0.56828900  |
| C | 3.62162600  | -0.21530500 | -0.32805300 |
| H | 3.91869000  | 0.52255700  | -1.07335000 |
| H | 4.12917000  | -1.15641900 | -0.55298500 |
| H | 3.94742300  | 0.13491100  | 0.65510400  |
| N | -1.72413800 | 0.48048100  | 1.56252400  |
| C | -2.39051200 | 0.24632600  | 0.23152600  |
| C | -1.77949400 | -1.02523300 | -0.42189000 |
| O | -2.13801600 | -1.27246500 | -1.58127300 |
| O | -0.99507100 | -1.70502900 | 0.31235600  |
| H | -0.72576300 | 0.79188300  | 1.41946800  |
| H | -2.21850600 | 1.17767500  | 2.11899000  |
| H | -3.43953300 | 0.02775200  | 0.44296200  |
| H | -1.68236900 | -0.39829200 | 2.08146500  |
| C | -2.27331600 | 1.49329400  | -0.63796500 |
| H | -1.22674700 | 1.73572400  | -0.83698400 |
| H | -2.75055900 | 2.35168300  | -0.15901500 |
| H | -2.77295500 | 1.30431500  | -1.58705100 |

26

Ala-Ala (LD)\_2nd

|   |           |           |           |
|---|-----------|-----------|-----------|
| N | -1.86878  | 1.41289   | -0.600117 |
| C | -2.108285 | -0.07239  | -0.573099 |
| C | -1.467718 | -0.600786 | 0.739223  |
| O | -0.834097 | -1.692608 | 0.652975  |
| O | -1.655537 | 0.09451   | 1.754947  |
| H | -2.391464 | 1.884637  | -1.33811  |
| H | -0.831983 | 1.55657   | -0.738934 |
| H | -1.586647 | -0.483398 | -1.435109 |
| H | -2.134212 | 1.803048  | 0.309045  |
| C | -3.599752 | -0.382616 | -0.629984 |

|   |           |           |           |
|---|-----------|-----------|-----------|
| H | -4.118639 | 0.053174  | 0.227005  |
| H | -4.046325 | 0.002621  | -1.550039 |
| H | -3.745055 | -1.464046 | -0.608584 |
| N | 1.526571  | -1.466457 | -0.6487   |
| C | 2.273379  | -0.452004 | 0.175748  |
| C | 1.542635  | 0.911536  | 0.068099  |
| O | 0.746997  | 1.029157  | -0.915546 |
| O | 1.817801  | 1.754602  | 0.933712  |
| H | 2.037618  | -2.345314 | -0.734958 |
| H | 1.359825  | -1.078995 | -1.580516 |
| H | 2.220887  | -0.794185 | 1.209022  |
| H | 0.579393  | -1.653337 | -0.216003 |
| C | 3.724421  | -0.346292 | -0.284992 |
| H | 4.245889  | -1.300246 | -0.174826 |
| H | 4.236664  | 0.397304  | 0.32583   |
| H | 3.780127  | -0.032834 | -1.33078  |

26

Ala-Ala\_LD\_3rd

|   |           |           |           |
|---|-----------|-----------|-----------|
| N | 1.143609  | -1.256542 | -1.090969 |
| C | 2.344503  | -0.641239 | -0.421738 |
| C | 2.108682  | 0.881191  | -0.240369 |
| O | 0.968822  | 1.319381  | -0.593345 |
| O | 3.058002  | 1.524011  | 0.230314  |
| H | 0.848266  | -0.676885 | -1.877965 |
| H | 1.343059  | -2.197445 | -1.43146  |
| H | 3.18784   | -0.77217  | -1.101659 |
| H | 0.320734  | -1.302755 | -0.428973 |
| C | 2.610473  | -1.347507 | 0.904517  |
| H | 1.757364  | -1.234383 | 1.578067  |
| H | 2.80075   | -2.412851 | 0.754642  |
| H | 3.487084  | -0.900685 | 1.371907  |
| N | -1.143596 | 1.256709  | 1.090691  |
| C | -2.344557 | 0.64122   | 0.421762  |
| C | -2.108606 | -0.881201 | 0.24052   |
| O | -0.968596 | -1.319166 | 0.593251  |
| O | -3.057934 | -1.524185 | -0.229938 |
| H | -0.320772 | 1.30276   | 0.428616  |
| H | -1.343034 | 2.19772   | 1.430893  |
| H | -3.187791 | 0.772189  | 1.101793  |
| H | -0.848135 | 0.677324  | 1.877843  |
| C | -2.61076  | 1.347291  | -0.904563 |
| H | -2.800999 | 2.41266   | -0.754806 |
| H | -1.757769 | 1.234077  | -1.578248 |
| H | -3.48746  | 0.900417  | -1.371735 |

38

Iva-Iva (LL) 1st

|   |             |             |             |
|---|-------------|-------------|-------------|
| N | -1.67010300 | 1.11370900  | -1.06288900 |
| H | -1.74524900 | 0.46345500  | -1.84651700 |
| C | -2.25893500 | 0.48306000  | 0.18371300  |
| C | -3.78838400 | 0.38766300  | 0.03190300  |
| C | -1.64472700 | -0.94843800 | 0.30882100  |
| H | -4.16134800 | -0.03013300 | 0.96946200  |
| C | -4.28452900 | -0.46100700 | -1.14293100 |
| O | -0.99679800 | -1.36647300 | -0.70153000 |
| H | -5.37594200 | -0.49890400 | -1.13870000 |
| H | -3.91314000 | -1.48692700 | -1.08135600 |
| H | -3.98278100 | -0.04934600 | -2.11058900 |
| C | -1.87460900 | 1.35884000  | 1.37783600  |
| H | -0.79098500 | 1.44128900  | 1.48262100  |
| H | -2.27594800 | 0.90951900  | 2.28493900  |
| H | -2.29289400 | 2.36363900  | 1.27005500  |
| H | -4.19197400 | 1.40391300  | -0.04245500 |
| H | -2.13779800 | 1.98911700  | -1.30020300 |
| O | -1.86314300 | -1.55234000 | 1.36831100  |
| H | -0.63937400 | 1.29349400  | -0.92970400 |
| N | 1.66986700  | -1.11426500 | -1.06243700 |
| H | 1.74509000  | -0.46450900 | -1.84646700 |
| C | 2.25883400  | -0.48296300 | 0.18376600  |
| C | 3.78830200  | -0.38795400 | 0.03191400  |

|   |            |             |             |
|---|------------|-------------|-------------|
| C | 1.64491600 | 0.94873100  | 0.30800800  |
| H | 4.16134200 | 0.03019100  | 0.96928600  |
| C | 4.28461800 | 0.46011300  | -1.14328800 |
| O | 1.86391600 | 1.55344200  | 1.36691500  |
| H | 5.37603600 | 0.49785000  | -1.13903700 |
| H | 3.91338100 | 1.48611800  | -1.08219200 |
| H | 3.98284900 | 0.04805900  | -2.11077100 |
| C | 1.87430900 | -1.35792300 | 1.37842700  |
| H | 0.79066300 | -1.44001700 | 1.48328400  |
| H | 2.29232200 | -2.36289900 | 1.27124100  |
| H | 2.27578700 | -0.90815700 | 2.28524800  |
| H | 4.19170200 | -1.40431300 | -0.04198600 |
| H | 0.63910400 | -1.29384600 | -0.92914600 |
| O | 0.99660200 | 1.36605200  | -0.70238400 |
| H | 2.13743300 | -1.98988400 | -1.29923400 |

38

Iva-Iva\_(LL)\_2nd

|   |               |               |               |
|---|---------------|---------------|---------------|
| N | 1.6978672461  | -1.0731334931 | -0.9528113852 |
| H | 0.6987801759  | -1.3023209849 | -0.7026748201 |
| C | 2.2725319554  | -0.080716125  | 0.0379184784  |
| C | 3.7489284612  | 0.1930184565  | -0.3159166266 |
| C | 1.4769179976  | 1.2530558892  | -0.1456495419 |
| H | 4.0754253444  | 0.9959887742  | 0.348418198   |
| C | 4.7057155914  | -0.9978820167 | -0.1945764968 |
| O | 1.6262636769  | 2.1136909348  | 0.7328009824  |
| H | 5.7145712549  | -0.6851628604 | -0.4731746036 |
| H | 4.436867068   | -1.8239512867 | -0.8603146392 |
| H | 4.7495868505  | -1.3839806286 | 0.8256168825  |
| C | 2.0781287905  | -0.6490657258 | 1.444447545   |
| H | 1.017936578   | -0.7701576655 | 1.6756098046  |
| H | 2.5662915046  | -1.6200171961 | 1.5527394384  |
| H | 2.5121443895  | 0.0420887095  | 2.1655182093  |
| H | 3.7899075545  | 0.5954341639  | -1.3342434827 |
| H | 1.6744784366  | -0.6498420341 | -1.882353893  |
| O | 0.7685137888  | 1.3362131923  | -1.1981540146 |
| H | 2.2382858817  | -1.9371799271 | -0.9870895812 |
| N | -1.8656607371 | 0.734247651   | -1.2981683393 |
| H | -0.8581784894 | 1.0470158242  | -1.2862879416 |
| C | -2.3327061476 | 0.4102739657  | 0.1075867201  |
| C | -3.8433479336 | 0.1099203798  | 0.0882119119  |
| C | -1.5441914458 | -0.856416523  | 0.5730476493  |
| H | -4.1307419683 | -0.0613080089 | 1.127887546   |
| C | -4.2739039602 | -1.0867985583 | -0.7660529015 |
| O | -0.8979310441 | -1.4724498392 | -0.3317249204 |
| H | -4.0715499523 | -0.9354555499 | -1.8304512143 |
| H | -5.3499424782 | -1.24467035   | -0.6659423955 |
| H | -3.7701973884 | -2.0046448637 | -0.4529107286 |
| C | -2.0220195845 | 1.6170694228  | 0.994842522   |
| H | -2.5765419301 | 2.497173606   | 0.6571144867  |
| H | -0.9557791742 | 1.8524615156  | 0.9937267011  |
| H | -2.323292483  | 1.3865532485  | 2.0155963134  |
| H | -4.3705290001 | 1.0137120885  | -0.2379970718 |
| H | -2.4384565793 | 1.4602692927  | -1.7297520392 |
| O | -1.6413610198 | -1.1590872248 | 1.7703028046  |
| H | -1.8930282302 | -0.1086242533 | -1.8738255567 |

38

Iva-Iva\_(LL)\_3rd

|   |               |               |               |
|---|---------------|---------------|---------------|
| N | -1.7973457773 | 0.7577722045  | -1.3048459253 |
| H | -1.9170401666 | -0.1050043139 | -1.8378159461 |
| C | -2.2745832574 | 0.5458910284  | 0.1192290578  |
| C | -3.8073301628 | 0.3875716544  | 0.1233084489  |
| C | -1.6049927809 | -0.7687385787 | 0.6367067363  |
| H | -4.0982685669 | 0.2854173564  | 1.171141542   |
| C | -4.3573973981 | -0.7951621745 | -0.680111512  |
| O | -1.6936834836 | -0.9951490273 | 1.8511774794  |
| H | -5.4433737823 | -0.84169455   | -0.5738076234 |
| H | -3.9449371601 | -1.7445206373 | -0.3300174362 |
| H | -4.1446779509 | -0.707492286  | -1.749744417  |
| C | -1.8433230085 | 1.7578038552  | 0.9460758973  |

|   |               |               |               |
|---|---------------|---------------|---------------|
| H | -2.1549175277 | 1.6043358035  | 1.978291324   |
| H | -2.3169003017 | 2.669503493   | 0.5708100884  |
| H | -0.7595559915 | 1.8885912162  | 0.9279941389  |
| H | -4.2511799665 | 1.3233595124  | -0.2353814026 |
| H | -2.3032350232 | 1.5151913799  | -1.7651622565 |
| O | -1.0603113155 | -1.4988243848 | -0.2499816347 |
| H | -0.7632663568 | 0.9689977071  | -1.3249162893 |
| N | 1.524568938   | -1.4474918281 | -0.999690381  |
| H | 1.482484202   | -1.0395359945 | -1.935830666  |
| C | 2.256657269   | -0.493422555  | -0.0751636105 |
| C | 3.7149968652  | -0.4149048308 | -0.5785000824 |
| C | 1.5534268171  | 0.8948210791  | -0.2309679725 |
| H | 4.1282097266  | -1.4306578615 | -0.5658946016 |
| C | 4.6319319056  | 0.510911701   | 0.2240156475  |
| O | 1.7051973808  | 1.7143781564  | 0.6850223372  |
| H | 5.628277116   | 0.5166577288  | -0.224073889  |
| H | 4.7344490537  | 0.1768037514  | 1.2587940042  |
| H | 4.2526940095  | 1.5336659266  | 0.2349723402  |
| C | 2.1376536297  | -1.038179125  | 1.34653508    |
| H | 2.5864930524  | -0.3316772166 | 2.0410594522  |
| H | 2.6528901848  | -1.9986612178 | 1.4378940576  |
| H | 1.0900974324  | -1.1690776291 | 1.627288664   |
| H | 3.6992245431  | -0.0924520109 | -1.6255077525 |
| H | 1.9824604657  | -2.3581613938 | -1.0455573365 |
| O | 0.8988016678  | 1.0557262935  | -1.3107598114 |
| H | 0.5254767187  | -1.5688622322 | -0.6841397494 |

38

Iva-Iva (LD) 1st

|   |             |             |             |
|---|-------------|-------------|-------------|
| N | -1.73746100 | 0.40778500  | -1.51263500 |
| H | -1.61682500 | -0.36917700 | -2.16540400 |
| C | -2.38413200 | -0.11252900 | -0.24385100 |
| C | -2.26457100 | 0.96229300  | 0.85237700  |
| C | -1.59725000 | -1.40043800 | 0.16910800  |
| H | -1.20513000 | 1.11694700  | 1.07655300  |
| C | -2.91465500 | 2.31286800  | 0.53365300  |
| O | -0.79143000 | -1.86217400 | -0.69947300 |
| H | -3.98580300 | 2.22180100  | 0.34038500  |
| H | -2.79074800 | 2.98774800  | 1.38363700  |
| H | -2.45202700 | 2.80252900  | -0.32866800 |
| C | -3.83179100 | -0.49958500 | -0.56280400 |
| H | -4.41035500 | 0.35644400  | -0.91664600 |
| H | -3.86798200 | -1.27900300 | -1.32837900 |
| H | -4.30218500 | -0.88457000 | 0.34198900  |
| H | -2.71224800 | 0.53107200  | 1.74874600  |
| H | -2.29464600 | 1.13731700  | -1.95656900 |
| O | -1.84348200 | -1.86471400 | 1.29075400  |
| H | -0.77068200 | 0.77753800  | -1.30984600 |
| N | 1.83312400  | -1.21665200 | -0.87249200 |
| H | 1.89004800  | -0.66420600 | -1.72962300 |
| C | 2.19285200  | -0.35002900 | 0.31911900  |
| C | 3.70292100  | -0.04975200 | 0.29204900  |
| C | 1.38157200  | 0.97903300  | 0.18281100  |
| H | 3.91428900  | 0.52798900  | 1.19435400  |
| C | 4.20310300  | 0.71565800  | -0.93696800 |
| O | 1.40880100  | 1.74435900  | 1.15636800  |
| H | 5.27339800  | 0.91112400  | -0.84255200 |
| H | 4.06109400  | 0.15314700  | -1.86430000 |
| H | 3.69491800  | 1.67724500  | -1.04367400 |
| C | 1.80240500  | -1.10961800 | 1.58860600  |
| H | 0.73645300  | -1.34524900 | 1.60368000  |
| H | 2.03024400  | -0.48680400 | 2.45236000  |
| H | 2.36791000  | -2.04206300 | 1.67172800  |
| H | 4.24451900  | -0.99748300 | 0.39151100  |
| H | 0.83301700  | -1.54237800 | -0.80070100 |
| O | 0.78912200  | 1.15921000  | -0.92724200 |
| H | 2.44630100  | -2.02874500 | -0.95055800 |

38

Iva-Iva\_(LD)\_2nd



|   |               |               |               |
|---|---------------|---------------|---------------|
| N | 1.5937119414  | -1.4313424154 | -0.4983084453 |
| H | 1.6889392029  | -1.1704419477 | -1.4804053774 |
| C | 2.181205606   | -0.3490995877 | 0.3865860442  |
| C | 3.7157073354  | -0.3892105817 | 0.2824016177  |
| C | 1.6360213085  | 1.024389835   | -0.1233788408 |
| H | 4.0881276654  | 0.3696882674  | 0.9730472685  |
| C | 4.2828799726  | -0.1327926584 | -1.1173986484 |
| O | 2.0105084797  | 2.0251548615  | 0.5030623067  |
| H | 3.9812647404  | -0.8995116464 | -1.8371420147 |
| H | 5.3744440627  | -0.1380050391 | -1.0845127731 |
| H | 3.9650863441  | 0.8390290761  | -1.5039441108 |
| C | 1.7128681525  | -0.6127104124 | 1.8196199207  |
| H | 2.1019489094  | -1.5661435419 | 2.1875376221  |
| H | 2.0822408955  | 0.1860581672  | 2.4613727435  |
| H | 0.6229114951  | -0.6346501255 | 1.8828234898  |
| H | 4.0640268842  | -1.3579098908 | 0.6591249478  |
| H | 0.5600336387  | -1.5472303786 | -0.3238324763 |
| O | 0.8752747722  | 0.9855946189  | -1.1394109651 |
| H | 2.051720742   | -2.3304985314 | -0.3452925853 |
| N | -1.7154100607 | 0.3143309028  | -1.5799395755 |
| H | -1.5741296043 | -0.5519193804 | -2.1023976942 |
| C | -2.6316865375 | 0.0418811589  | -0.4007953812 |
| C | -2.833751926  | 1.3364327991  | 0.3997548582  |
| C | -1.9794330227 | -1.0974371046 | 0.4470581808  |
| H | -3.2949792711 | 2.0809323774  | -0.2595818188 |
| C | -1.5779655868 | 1.9172865617  | 1.0535879351  |
| O | -2.4570231366 | -1.2919576458 | 1.5730952867  |
| H | -1.1146460713 | 1.1910653566  | 1.7257994239  |
| H | -0.8284376612 | 2.2227792815  | 0.3221148336  |
| H | -1.840806295  | 2.797374254   | 1.6451129323  |
| C | -3.9651562054 | -0.4690251044 | -0.960774516  |
| H | -3.8260881704 | -1.3750509854 | -1.556294977  |
| H | -4.6325580085 | -0.7033310868 | -0.1316873404 |
| H | -4.4419605956 | 0.2915024875  | -1.5853836953 |
| H | -3.5710503357 | 1.1016119976  | 1.1691685849  |
| H | -0.7497575694 | 0.6301403521  | -1.303825813  |
| O | -1.0511082951 | -1.7500204837 | -0.1234134953 |
| H | -2.1190197954 | 1.0110301924  | -2.207772453  |

38

Iva-Iva\_(LD)\_3rd

|   |           |           |           |
|---|-----------|-----------|-----------|
| N | 1.560686  | -1.322785 | 0.176061  |
| H | 0.58273   | -1.305895 | -0.222578 |
| C | 2.434873  | -0.284501 | -0.498193 |
| C | 3.894426  | -0.476665 | -0.052312 |
| C | 1.910774  | 1.121865  | -0.063501 |
| H | 4.237107  | -1.459672 | -0.395199 |
| C | 4.145379  | -0.325317 | 1.451433  |
| O | 0.9625    | 1.129378  | 0.783493  |
| H | 3.822703  | 0.654475  | 1.813324  |
| H | 5.212157  | -0.424184 | 1.663126  |
| H | 3.630917  | -1.090746 | 2.039796  |
| C | 2.281711  | -0.465492 | -2.010211 |
| H | 2.634864  | -1.452364 | -2.321962 |
| H | 1.238081  | -0.354065 | -2.313093 |
| H | 2.87504   | 0.293464  | -2.518109 |
| H | 4.47805   | 0.26768   | -0.597555 |
| H | 1.462016  | -1.106169 | 1.168715  |
| O | 2.472108  | 2.098089  | -0.580325 |
| H | 1.943825  | -2.263288 | 0.074344  |
| N | -1.559472 | 1.321966  | -0.176365 |
| H | -1.942259 | 2.262812  | -0.076756 |
| C | -2.435334 | 0.285088  | 0.497888  |
| C | -3.893999 | 0.477327  | 0.049034  |
| C | -1.911213 | -1.122129 | 0.065952  |
| H | -4.236722 | 1.46109   | 0.389721  |
| C | -4.142385 | 0.323651  | -1.454899 |
| O | -2.473449 | -2.097334 | 0.583638  |
| H | -5.208686 | 0.423226  | -1.66866  |
| H | -3.626091 | 1.087516  | -2.043685 |
| H | -3.820045 | -0.657089 | -1.814497 |

|   |           |           |           |
|---|-----------|-----------|-----------|
| C | -2.284885 | 0.468227  | 2.009894  |
| H | -1.241817 | 0.357146  | 2.314826  |
| H | -2.63855  | 1.455568  | 2.319606  |
| H | -2.879196 | -0.289956 | 2.517792  |
| H | -4.479007 | -0.2658   | 0.594451  |
| H | -0.5823   | 1.305043  | 0.223951  |
| O | -0.962185 | -1.131262 | -0.780235 |
| H | -1.459195 | 1.103643  | -1.168501 |

32

Ala-Iva (LL) 1st

|   |             |             |             |
|---|-------------|-------------|-------------|
| N | 2.06446400  | -1.59347700 | -0.44843700 |
| C | 2.71224200  | -0.46850600 | 0.31143100  |
| C | 2.08058700  | 0.87052200  | -0.15037500 |
| O | 2.27207100  | 1.84979900  | 0.58516800  |
| O | 1.44464600  | 0.83337100  | -1.24961200 |
| H | 2.51482700  | -2.49051300 | -0.26579800 |
| H | 2.10710600  | -1.39168800 | -1.44984500 |
| H | 2.46903000  | -0.62469100 | 1.36258000  |
| H | 1.04094600  | -1.65469700 | -0.19529300 |
| C | 4.22400600  | -0.47698600 | 0.10167000  |
| H | 4.47296800  | -0.34448600 | -0.95473900 |
| H | 4.66736400  | -1.41179600 | 0.45302500  |
| H | 4.66454300  | 0.34527200  | 0.66560100  |
| N | -1.22876500 | 0.43273400  | -1.39768300 |
| H | -1.70591600 | 1.06510500  | -2.04107300 |
| C | -1.80409800 | 0.51502900  | 0.00337000  |
| C | -3.33464300 | 0.35491700  | -0.06580400 |
| C | -1.18408900 | -0.65999600 | 0.82742900  |
| H | -3.69955600 | 0.48199300  | 0.95563600  |
| C | -3.83809400 | -0.97834600 | -0.62774700 |
| O | -1.39745600 | -0.64976100 | 2.04700200  |
| H | -3.46720600 | -1.82424400 | -0.04375700 |
| H | -4.92953000 | -1.00418400 | -0.59903600 |
| H | -3.54195200 | -1.13139200 | -1.66961400 |
| C | -1.41625400 | 1.87340000  | 0.59014700  |
| H | -0.33212300 | 2.00013400  | 0.62266800  |
| H | -1.84857800 | 2.68604300  | -0.00057900 |
| H | -1.80262400 | 1.93851100  | 1.60624100  |
| H | -3.74206300 | 1.18784300  | -0.65029400 |
| H | -1.30200700 | -0.52515300 | -1.74392500 |
| O | -0.55095300 | -1.53564000 | 0.15702800  |
| H | -0.19952400 | 0.66078100  | -1.38636300 |

32

Ala-Iva\_LL\_2nd

|   |               |               |               |
|---|---------------|---------------|---------------|
| N | 2.43758593    | -1.0367562635 | 1.0089196226  |
| C | 2.7550701031  | 0.0061280835  | -0.0312350073 |
| C | 1.8390965923  | 1.2408732568  | 0.1970995724  |
| O | 1.8900285603  | 2.1300957472  | -0.6641019584 |
| O | 1.1402589829  | 1.2260261969  | 1.2583811218  |
| H | 1.4847620181  | -1.4545685051 | 0.8282427916  |
| H | 3.1349678327  | -1.7808559938 | 1.0249068794  |
| H | 3.7827043153  | 0.3270671107  | 0.1530827426  |
| H | 2.3922752968  | -0.5971536095 | 1.9297248633  |
| C | 2.6297068644  | -0.5948514363 | -1.427121983  |
| H | 3.3215684219  | -1.4306751791 | -1.5572034474 |
| H | 1.6128400735  | -0.9480966467 | -1.614577312  |
| H | 2.8712149661  | 0.1730465745  | -2.1606592439 |
| N | -1.3378237282 | 0.1677861485  | 1.4899380697  |
| H | -2.0104627047 | 0.7843334562  | 1.9449409089  |
| C | -1.8016260093 | -0.27073629   | 0.1142106752  |
| C | -1.7082908904 | 0.9266260183  | -0.8492836693 |
| C | -0.837163542  | -1.4155194159 | -0.3417529622 |
| H | -2.0092892575 | 0.5511555424  | -1.8281616137 |
| C | -2.5494309537 | 2.1509693668  | -0.4727906754 |
| O | -0.9080263117 | -1.7636465411 | -1.5279741351 |
| H | -2.243383788  | 2.5874610292  | 0.4828474927  |
| H | -3.6150525423 | 1.91854427    | -0.4159049466 |
| H | -2.4228289191 | 2.9283010085  | -1.2297368585 |
| C | -3.2179801402 | -0.8411755388 | 0.2400362914  |

|   |               |               |               |
|---|---------------|---------------|---------------|
| H | -3.9205699363 | -0.0968614483 | 0.6209202019  |
| H | -3.234392803  | -1.7041763776 | 0.91050519    |
| H | -3.5568443098 | -1.1647320479 | -0.7442257833 |
| H | -0.658954507  | 1.2225487608  | -0.9390598457 |
| H | -1.1928791818 | -0.6610449138 | 2.0700841716  |
| O | -0.0836454354 | -1.8975559069 | 0.5625919207  |
| H | -0.4029479971 | 0.6511255475  | 1.4292849258  |

32

Ala-Iva\_LL\_3rd

|   |               |               |               |
|---|---------------|---------------|---------------|
| N | -2.0198771222 | -1.5634520863 | -0.8658612084 |
| C | -2.6930274653 | -0.543806734  | 0.0158429111  |
| C | -2.2422535515 | 0.8801163302  | -0.4059111467 |
| O | -1.3693063261 | 0.9473190117  | -1.3250100431 |
| O | -2.7900786821 | 1.8178594598  | 0.1915386305  |
| H | -2.4561233769 | -2.4817888474 | -0.7803302173 |
| H | -0.9952388049 | -1.6504044077 | -0.6238881361 |
| H | -3.7647412622 | -0.6204810624 | -0.1749578963 |
| H | -2.0674427508 | -1.2649920139 | -1.8410014571 |
| C | -2.3907706818 | -0.846887755  | 1.4807392357  |
| H | -2.875603624  | -0.0939394775 | 2.1009074386  |
| H | -1.315540496  | -0.8186929944 | 1.6717213084  |
| H | -2.7687874649 | -1.831189326  | 1.767452487   |
| N | 1.2911776729  | 0.4443623339  | -1.5017763219 |
| H | 1.7223575306  | 1.2044793934  | -2.0297181525 |
| C | 2.0710683752  | 0.1400363595  | -0.2356362037 |
| C | 2.1110238778  | 1.3879363485  | 0.6576096142  |
| C | 1.3800591591  | -1.0808214776 | 0.4535717215  |
| H | 2.7493401877  | 1.129606196   | 1.5041500832  |
| C | 0.7581218083  | 1.8860806762  | 1.1710776726  |
| O | 1.6941280081  | -1.3073325889 | 1.6295746337  |
| H | 0.2437392898  | 1.1076595165  | 1.7391939551  |
| H | 0.096728764   | 2.2063990914  | 0.3644101931  |
| H | 0.9059256694  | 2.7401520334  | 1.8360840732  |
| C | 3.4859102274  | -0.2786039412 | -0.6549388748 |
| H | 3.4625024538  | -1.1477785935 | -1.3174009565 |
| H | 3.9988776657  | 0.5395558646  | -1.1680822532 |
| H | 4.0583108114  | -0.5406425686 | 0.2348605522  |
| H | 2.623915459   | 2.187815531   | 0.1111500995  |
| H | 1.2715612725  | -0.3909752929 | -2.0892125273 |
| O | 0.596425795   | -1.7568354772 | -0.2837620389 |
| H | 0.2803715811  | 0.6835624987  | -1.3286411759 |

32

Ala-Iva (LD) 1st

|   |             |             |             |
|---|-------------|-------------|-------------|
| N | -2.10756800 | -1.26553200 | -1.24339800 |
| C | -2.80229400 | -0.46300600 | -0.17436100 |
| C | -2.24656600 | 0.98827000  | -0.19561200 |
| O | -2.62941700 | 1.73672900  | 0.71480300  |
| O | -1.46591900 | 1.27136400  | -1.15741200 |
| H | -2.09438900 | -0.73406900 | -2.11557500 |
| H | -2.56426300 | -2.16336100 | -1.40316000 |
| H | -3.85615100 | -0.41203000 | -0.45665500 |
| H | -1.09954000 | -1.42855500 | -0.97485800 |
| C | -2.64721600 | -1.15109300 | 1.17771100  |
| H | -3.08580500 | -2.15182300 | 1.16182200  |
| H | -3.16301000 | -0.55828200 | 1.93169900  |
| H | -1.59465100 | -1.23274900 | 1.45900500  |
| N | 1.22111300  | 0.93821600  | -1.17195700 |
| H | 0.18692500  | 1.14026400  | -1.18782800 |
| C | 1.65080200  | 0.50562600  | 0.21647300  |
| C | 3.18598100  | 0.39218200  | 0.26293100  |
| C | 1.00524900  | -0.89368200 | 0.47918400  |
| H | 3.61083400  | 1.38863100  | 0.09611500  |
| C | 3.80466800  | -0.61380800 | -0.71274200 |
| O | 1.07920900  | -1.32830400 | 1.63646700  |
| H | 3.41321800  | -1.62127700 | -0.55158500 |
| H | 4.88725400  | -0.64847300 | -0.57351200 |
| H | 3.62486600  | -0.34418900 | -1.75765400 |
| C | 1.14370800  | 1.54878300  | 1.21394700  |
| H | 0.05709200  | 1.64662100  | 1.17444100  |

|   |            |             |             |
|---|------------|-------------|-------------|
| H | 1.42541500 | 1.23801400  | 2.21894300  |
| H | 1.59057700 | 2.52634200  | 1.01177800  |
| H | 3.43858600 | 0.11216100  | 1.28791700  |
| H | 1.73092100 | 1.76320000  | -1.48931200 |
| O | 0.48636000 | -1.46482800 | -0.53127200 |
| H | 1.36945800 | 0.17145500  | -1.82997200 |

32

Ala-Iva\_(LD)\_2nd

|   |               |               |               |
|---|---------------|---------------|---------------|
| N | 2.3582254145  | -0.8235567738 | 1.3654297449  |
| C | 2.8441718282  | -0.3279076342 | 0.0278064897  |
| C | 2.1219214965  | 1.0118551523  | -0.2938714036 |
| O | 2.2056986048  | 1.4265545306  | -1.4579378131 |
| O | 1.5350993334  | 1.5671688824  | 0.6882013771  |
| H | 2.9203365797  | -1.600445532  | 1.7124380852  |
| H | 2.3880769256  | -0.0552840244 | 2.0385953797  |
| H | 3.9051290866  | -0.0972632328 | 0.1509156506  |
| H | 1.3456704704  | -1.1188033744 | 1.2991283741  |
| C | 2.6545319118  | -1.4052919175 | -1.0323209131 |
| H | 3.2101770419  | -2.3106013159 | -0.7747122457 |
| H | 3.0286117624  | -1.027984678  | -1.9830310087 |
| H | 1.5975428801  | -1.6548812592 | -1.1494774374 |
| N | -1.0823631864 | 1.2247158072  | 1.25052699    |
| H | -1.6144844638 | 2.0755947711  | 1.4347966083  |
| C | -1.6804415257 | 0.4202841686  | 0.1115495465  |
| C | -3.1511247208 | 0.1355740566  | 0.4878572974  |
| C | -0.8734262903 | -0.9183934291 | 0.0507347333  |
| H | -3.6499081189 | 1.0993626359  | 0.6449428822  |
| C | -3.9373493486 | -0.6771335891 | -0.5434529731 |
| O | -0.8766111232 | -1.5372594327 | -1.02157634   |
| H | -3.4649944453 | -1.6422684963 | -0.7326349102 |
| H | -4.9501104857 | -0.8550424315 | -0.1745779155 |
| H | -4.0182625027 | -0.1476561242 | -1.4952610273 |
| C | -1.5330087627 | 1.2414348009  | -1.1672982892 |
| H | -0.4865231582 | 1.4968465776  | -1.3480592716 |
| H | -2.1198811352 | 2.1625616883  | -1.1061177359 |
| H | -1.8870924109 | 0.6567419732  | -2.0133716616 |
| H | -3.1636249839 | -0.388203305  | 1.4499736741  |
| H | -0.0806291622 | 1.4725321345  | 1.0346971711  |
| O | -0.3018608434 | -1.2568052608 | 1.1370308128  |
| H | -1.0607246681 | 0.6464726319  | 2.0932181292  |

32

Ala-Iva\_(LD)\_3rd

|   |               |               |               |
|---|---------------|---------------|---------------|
| N | -2.4210822913 | -0.7635344056 | -1.3644696536 |
| C | -2.8898569906 | -0.0566501461 | -0.1191816049 |
| C | -2.0351554805 | 1.2267139571  | 0.0774600686  |
| O | -2.1782226147 | 1.8264719446  | 1.1522307863  |
| O | -1.2851861104 | 1.5477595198  | -0.8971671511 |
| H | -2.3265882627 | -0.0864346943 | -2.1235592246 |
| H | -3.0637927439 | -1.5027757382 | -1.6482928963 |
| H | -3.9158687907 | 0.2652618709  | -0.3113121022 |
| H | -1.4602482658 | -1.1716329255 | -1.2068410933 |
| C | -2.846934338  | -1.0090991926 | 1.0705266766  |
| H | -3.205613274  | -0.4809066715 | 1.9527615578  |
| H | -1.8280569613 | -1.3538290924 | 1.2618506923  |
| H | -3.4882634518 | -1.8775084083 | 0.9003278633  |
| N | 1.2857094374  | 0.7498310008  | -1.1804440685 |
| H | 1.2561598012  | 0.09088585    | -1.9608234646 |
| C | 1.6729992029  | 0.0069837019  | 0.0831620664  |
| C | 3.1275817844  | -0.4896454929 | -0.0483218737 |
| C | 0.7411767863  | -1.2461296889 | 0.1703629029  |
| H | 3.3086848796  | -1.1318752947 | 0.816354913   |
| C | 4.2061178446  | 0.5967368507  | -0.1169103821 |
| O | 0.7096816576  | -1.8418596182 | 1.2557637568  |
| H | 4.0717209421  | 1.2719627853  | -0.9677203299 |
| H | 4.2337504212  | 1.2001471218  | 0.7923963748  |
| H | 5.1871295746  | 0.1313225555  | -0.2355405804 |
| C | 1.4552855621  | 0.9450446893  | 1.2712841416  |
| H | 0.401098807   | 1.2083133452  | 1.3762521726  |
| H | 2.0297630619  | 1.867157224   | 1.1593951125  |

|   |              |               |               |
|---|--------------|---------------|---------------|
| H | 1.7778942324 | 0.4418115503  | 2.1816863871  |
| H | 3.1935964388 | -1.1325214229 | -0.9332700102 |
| H | 0.3127660124 | 1.1439180174  | -1.0866732952 |
| O | 0.121221986  | -1.5495868432 | -0.8979517262 |
| H | 1.9348761433 | 1.5062296505  | -1.3957680156 |

26

Ala-Ala (LL) non-ion

|   |             |             |             |
|---|-------------|-------------|-------------|
| N | -4.06321400 | -0.94075600 | -0.66083200 |
| H | -3.74418400 | -1.74578500 | -0.12819400 |
| C | -3.43055700 | 0.27543300  | -0.14966700 |
| H | -3.71873800 | 1.11098200  | -0.79296200 |
| C | -3.79040500 | 0.63404400  | 1.31014100  |
| C | -1.92348500 | 0.13944500  | -0.24522400 |
| H | -3.49105900 | -0.17268800 | 1.98488400  |
| H | -3.30194200 | 1.55910900  | 1.62495300  |
| H | -4.87121900 | 0.76863900  | 1.38992700  |
| O | -1.35034400 | -0.94503200 | -0.24074000 |
| H | -5.06826800 | -0.87795300 | -0.52947100 |
| O | -1.29514800 | 1.30081900  | -0.27757300 |
| H | -0.30506500 | 1.16550100  | -0.26817700 |
| N | 4.06318500  | 0.94077200  | -0.66085200 |
| H | 3.74414800  | 1.74579500  | -0.12820900 |
| C | 3.43056000  | -0.27543000 | -0.14968000 |
| H | 3.71874000  | -1.11097800 | -0.79297700 |
| C | 3.79042900  | -0.63402800 | 1.31012600  |
| C | 1.92348600  | -0.13945600 | -0.24521200 |
| H | 3.49111100  | 0.17271600  | 1.98486900  |
| H | 3.30195700  | -1.55908100 | 1.62495700  |
| H | 4.87124200  | -0.76864000 | 1.38989200  |
| O | 1.35033900  | 0.94501700  | -0.24073400 |
| H | 5.06824200  | 0.87798600  | -0.52950300 |
| O | 1.29515200  | -1.30083200 | -0.27756900 |
| H | 0.30506500  | -1.16553600 | -0.26817700 |

26

Ala-Ala (LD) non-ion

|   |             |             |             |
|---|-------------|-------------|-------------|
| N | -3.98825500 | 1.23846800  | 0.34257200  |
| H | -3.72707500 | 1.70474900  | -0.52227100 |
| C | -3.42197000 | -0.11046400 | 0.37050400  |
| H | -3.63919200 | -0.55603000 | 1.34471900  |
| C | -3.94450000 | -1.06074900 | -0.73095300 |
| C | -1.91327600 | -0.02676700 | 0.24440100  |
| H | -3.71765500 | -0.65690900 | -1.72155800 |
| H | -3.49972200 | -2.05476000 | -0.64316400 |
| H | -5.02824400 | -1.15695700 | -0.63636100 |
| O | -1.34298000 | 0.90299000  | -0.31697100 |
| H | -5.00190800 | 1.17801800  | 0.35194200  |
| O | -1.28655900 | -1.07500900 | 0.74711500  |
| H | -0.30293100 | -1.00921400 | 0.58257700  |
| N | 3.98806400  | -1.23858400 | -0.34285800 |
| H | 3.72702300  | -1.70486300 | 0.52202700  |
| C | 3.42191900  | 0.11041000  | -0.37062300 |
| H | 3.63899800  | 0.55599000  | -1.34486400 |
| C | 3.94477300  | 1.06059300  | 0.73076700  |
| C | 1.91324100  | 0.02687500  | -0.24421300 |
| H | 3.71806400  | 0.65674700  | 1.72140000  |
| H | 3.50010300  | 2.05466200  | 0.64309500  |
| H | 5.02851100  | 1.15666600  | 0.63597200  |
| O | 1.34295300  | -0.90287600 | 0.31717800  |
| H | 5.00172200  | -1.17824300 | -0.35244900 |
| O | 1.28653500  | 1.07516100  | -0.74684700 |
| H | 0.30293300  | 1.00943600  | -0.58215500 |

38

Iva-Iva (LL) non-ion

|   |            |             |             |
|---|------------|-------------|-------------|
| N | 3.94170500 | -0.60210700 | -1.34556600 |
| H | 3.46098300 | -0.02022300 | -2.02400700 |
| C | 3.45432400 | -0.33191800 | 0.01312100  |
| C | 3.82061800 | 1.09021000  | 0.54279200  |
| C | 1.93092700 | -0.42905800 | -0.00581100 |

|   |             |             |             |
|---|-------------|-------------|-------------|
| H | 3.46742000  | 1.17775100  | 1.57397700  |
| H | 4.91445300  | 1.13477100  | 0.57630900  |
| O | 1.27344700  | -0.44216100 | -1.04198800 |
| H | 4.93009500  | -0.37342300 | -1.39847300 |
| O | 1.38649400  | -0.44230300 | 1.19729000  |
| H | 0.38941400  | -0.45025900 | 1.12957300  |
| N | -3.94173600 | -0.60213600 | 1.34552400  |
| H | -3.46094500 | -0.02035000 | 2.02399900  |
| C | -3.45434400 | -0.33190400 | -0.01315200 |
| C | -3.82051100 | 1.09029500  | -0.54272300 |
| C | -1.93095500 | -0.42919600 | 0.00576300  |
| H | -3.46724300 | 1.17790100  | -1.57387900 |
| H | -4.91434100 | 1.13493700  | -0.57630700 |
| O | -1.27347700 | -0.44238200 | 1.04194000  |
| H | -4.93010100 | -0.37335100 | 1.39845800  |
| O | -1.38650700 | -0.44205000 | -1.19733400 |
| H | -0.38942400 | -0.45000000 | -1.12961400 |
| C | 3.27863300  | 2.25207300  | -0.29244100 |
| H | 2.18470300  | 2.26198700  | -0.31266400 |
| H | 3.60851000  | 3.20500500  | 0.12793000  |
| H | 3.63395900  | 2.20718100  | -1.32527600 |
| C | -3.27850200 | 2.25205200  | 0.29264200  |
| H | -2.18457200 | 2.26189700  | 0.31292900  |
| H | -3.60829600 | 3.20504200  | -0.12766400 |
| H | -3.63388800 | 2.20709100  | 1.32545300  |
| C | -4.04024000 | -1.39534600 | -0.95860200 |
| H | -3.73906700 | -2.39687400 | -0.64477500 |
| H | -5.13136400 | -1.33873800 | -0.92564400 |
| H | -3.71586900 | -1.23187400 | -1.98636500 |
| C | 4.04010500  | -1.39548000 | 0.95851100  |
| H | 3.73885400  | -2.39696000 | 0.64460300  |
| H | 5.13123400  | -1.33896600 | 0.92559300  |
| H | 3.71571500  | -1.23205300 | 1.98627600  |

38

Iva-Iva (LD) non-ion

|   |             |             |             |
|---|-------------|-------------|-------------|
| N | 3.86294800  | -0.42823100 | -1.50336600 |
| H | 3.48997000  | 0.38274900  | -1.98616700 |
| C | 3.42565400  | -0.44939400 | -0.10153900 |
| C | 4.02652500  | 0.70235500  | 0.76371400  |
| C | 1.90756400  | -0.28835600 | -0.08012500 |
| H | 3.69479600  | 0.56890500  | 1.79708900  |
| H | 5.11236300  | 0.55932200  | 0.75715500  |
| O | 1.25799000  | 0.07143100  | -1.05713600 |
| H | 4.87594000  | -0.36051900 | -1.53738600 |
| O | 1.36765800  | -0.52095100 | 1.10250200  |
| H | 0.38318700  | -0.35014000 | 1.07692300  |
| N | -3.86296500 | 0.42822100  | 1.50336300  |
| H | -3.48996700 | -0.38273700 | 1.98618300  |
| C | -3.42566700 | 0.44936600  | 0.10153600  |
| C | -4.02650500 | -0.70241800 | -0.76369400 |
| C | -1.90757200 | 0.28838000  | 0.08011400  |
| H | -3.69479300 | -0.56896800 | -1.79707400 |
| H | -5.11234800 | -0.55942300 | -0.75712500 |
| O | -1.25797400 | -0.07138000 | 1.05711900  |
| H | -4.87595600 | 0.36048500  | 1.53738500  |
| O | -1.36767200 | 0.52107400  | -1.10249800 |
| H | -0.38319800 | 0.35031900  | -1.07690600 |
| C | 3.82101200  | -1.80599700 | 0.50830300  |
| H | 3.35867900  | -2.62567100 | -0.04537400 |
| H | 4.90645700  | -1.92047700 | 0.44846700  |
| H | 3.52329900  | -1.87048200 | 1.55492600  |
| C | 3.68584000  | 2.11609000  | 0.28773300  |
| H | 2.60928500  | 2.30837900  | 0.32434100  |
| H | 4.17391000  | 2.85677600  | 0.92552900  |
| H | 4.02419900  | 2.28993900  | -0.73710900 |
| C | -3.68576500 | -2.11613500 | -0.28770000 |
| H | -4.17380900 | -2.85684400 | -0.92548900 |
| H | -2.60920400 | -2.30838400 | -0.32430900 |
| H | -4.02411600 | -2.28998800 | 0.73714400  |
| C | -3.82107400 | 1.80594300  | -0.50833200 |

|   |             |            |             |
|---|-------------|------------|-------------|
| H | -4.90652300 | 1.92038700 | -0.44849500 |
| H | -3.35876600 | 2.62564400 | 0.04532500  |
| H | -3.52336800 | 1.87041300 | -1.55495800 |

32

Ala-Iva (LL) non-ion

|   |             |             |             |
|---|-------------|-------------|-------------|
| N | -3.45718800 | 0.17270200  | 1.40922800  |
| H | -3.01259300 | 1.04451600  | 1.67798000  |
| C | -2.92696000 | -0.31074300 | 0.12788400  |
| C | -3.30711100 | 0.58941000  | -1.08941200 |
| C | -1.40337900 | -0.32410800 | 0.22353000  |
| H | -2.92335900 | 0.12178100  | -2.00031600 |
| H | -4.40009400 | 0.56956400  | -1.15738700 |
| O | -0.78284200 | 0.24332100  | 1.11720100  |
| H | -4.45104000 | 0.35888600  | 1.31084300  |
| O | -0.81689700 | -0.95714700 | -0.77654000 |
| H | 0.17648900  | -0.88559400 | -0.70190100 |
| N | 4.56278800  | -1.09824900 | -0.50070000 |
| H | 4.20057600  | -1.09991500 | -1.45064000 |
| C | 3.96171200  | -0.00106500 | 0.25832200  |
| H | 4.30215400  | -0.07148100 | 1.29460800  |
| C | 4.28814400  | 1.41415400  | -0.27048400 |
| C | 2.45427600  | -0.16364700 | 0.27194700  |
| H | 3.93664900  | 1.52609000  | -1.29988200 |
| H | 3.82554500  | 2.18696800  | 0.34784000  |
| H | 5.37017700  | 1.56141500  | -0.25654400 |
| O | 1.83971200  | -0.75040700 | -0.61280200 |
| H | 5.56568100  | -0.95235500 | -0.56611200 |
| O | 1.87208900  | 0.43385400  | 1.29581600  |
| H | 0.87765100  | 0.35716800  | 1.22747600  |
| C | -2.81821300 | 2.03679700  | -1.00295500 |
| H | -1.72591800 | 2.09557900  | -0.97752200 |
| H | -3.15771900 | 2.60225100  | -1.87392900 |
| H | -3.20325500 | 2.54082100  | -0.11258800 |
| C | -3.45386200 | -1.73739100 | -0.10697800 |
| H | -3.14297700 | -2.40012400 | 0.70316900  |
| H | -4.54637700 | -1.71402600 | -0.13114600 |
| H | -3.09493700 | -2.14013100 | -1.05418900 |

32

Ala-Iva (LD) non-ion

|   |             |             |             |
|---|-------------|-------------|-------------|
| N | -4.45356800 | 1.15143700  | -0.74354900 |
| H | -4.18151900 | 0.81621400  | -1.66399400 |
| C | -3.95448400 | 0.23781000  | 0.28472300  |
| H | -4.18211700 | 0.66407200  | 1.26520400  |
| C | -4.53676600 | -1.19261900 | 0.22458600  |
| C | -2.44499200 | 0.13867900  | 0.18149500  |
| H | -4.30440900 | -1.65753400 | -0.73749000 |
| H | -4.13859700 | -1.81889500 | 1.02632300  |
| H | -5.62250600 | -1.14236800 | 0.33136400  |
| O | -1.83460600 | 0.33549500  | -0.86427500 |
| H | -5.46878600 | 1.16176600  | -0.72039100 |
| O | -1.86592300 | -0.23096900 | 1.30935400  |
| H | -0.88129500 | -0.34440400 | 1.17746900  |
| N | 3.39158400  | -1.09227200 | 1.03586000  |
| H | 3.02306800  | -0.65383300 | 1.87367000  |
| C | 2.90079300  | -0.41178300 | -0.16933500 |
| C | 3.44856700  | 1.03998800  | -0.33965800 |
| C | 1.38057100  | -0.31458100 | -0.06880500 |
| H | 3.07740800  | 1.44206500  | -1.28635400 |
| H | 4.53578200  | 0.94962000  | -0.43653100 |
| O | 0.76292000  | -0.52331500 | 0.97077600  |
| H | 4.40372100  | -1.01423000 | 1.07506300  |
| O | 0.80017800  | 0.06685900  | -1.19233200 |
| H | -0.18509600 | 0.16614600  | -1.06151100 |
| C | 3.10653800  | 1.99963400  | 0.80199500  |
| H | 3.55609400  | 2.97850100  | 0.61949500  |
| H | 2.02661800  | 2.14620300  | 0.89940100  |
| H | 3.48497700  | 1.63728300  | 1.76141600  |
| C | 3.29587300  | -1.25390300 | -1.39531500 |
| H | 4.38444800  | -1.34830300 | -1.42629800 |

|   |            |             |             |
|---|------------|-------------|-------------|
| H | 2.86656300 | -2.25561500 | -1.32831200 |
| H | 2.96237300 | -0.78475000 | -2.32100600 |
